# Supplementary material
Source: publisher site journal article supplement (https://www.dovepress.com/article/406199)
Supplement: Supplementary file 1 [file get_supplementary_file.php]

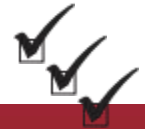

| Topic                                   | Item | Checklist item description                                                                             | Reported on Line                                                    |
|-----------------------------------------|------|--------------------------------------------------------------------------------------------------------|---------------------------------------------------------------------|
| Title                                   | 1    | The diagnosis or intervention of primary focus followed by the words “case report”                     | Line 3                                                              |
| Key Words                               | 2    | 2 to 5 key words that identify diagnoses or interventions in this case report, including "case report" | Line 27-28                                                          |
| Abstract<br>(no references)             | 3a   | Introduction: What is unique about this case and what does it add to the scientific literature?        | Line 15-16                                                          |
|                                         | 3b   | Main symptoms and/or important clinical findings                                                       | Line 45-58                                                          |
|                                         | 3c   | The main diagnoses, therapeutic interventions, and outcomes                                            | Line 83-100                                                         |
|                                         | 3d   | Conclusion—What is the main “take-away” lesson(s) from this case?                                      | Line 173-180                                                        |
| Introduction                            | 4    | One or two paragraphs summarizing why this case is unique ( <b>may include references</b> )            | Line 109-117                                                        |
|                                         | 5a   | De-identified patient specific information.                                                            | Line 45-58                                                          |
| Patient Information                     | 5b   | Primary concerns and symptoms of the patient.                                                          | Line 45-54                                                          |
|                                         | 5c   | Medical, family, and psycho-social history including relevant genetic information                      | Line 54-58                                                          |
|                                         | 5d   | Relevant past interventions with outcomes                                                              | Line 50-52                                                          |
|                                         | 6    | Describe significant physical examination (PE) and important clinical findings.                        | Line 56-58                                                          |
| Clinical Findings                       | 7    | Historical and current information from this episode of care organized as a timeline                   | Line 46-54                                                          |
|                                         | 8a   | Diagnostic testing (such as PE, laboratory testing, imaging, surveys).                                 | Line 56-82                                                          |
| Timeline                                | 8b   | Diagnostic challenges (such as access to testing, financial, or cultural)                              | Line 45-54                                                          |
|                                         | 8c   | Diagnosis (including other diagnoses considered)                                                       | Line 83-84                                                          |
|                                         | 8d   | Prognosis (such as staging in oncology) where applicable                                               | Line 45-54                                                          |
|                                         | 9a   | Types of therapeutic intervention (such as pharmacologic, surgical, preventive, self-care)             | Line 85-88                                                          |
| Therapeutic Intervention                | 9b   | Administration of therapeutic intervention (such as dosage, strength, duration)                        | Line 86-88                                                          |
|                                         | 9c   | Changes in therapeutic intervention (with rationale)                                                   | Line 88-100                                                         |
|                                         | 10a  | Clinician and patient-assessed outcomes (if available)                                                 | Not have.                                                           |
| Follow-up and Outcomes                  | 10b  | Important follow-up diagnostic and other test results                                                  | Line 89-100                                                         |
|                                         | 10c  | Intervention adherence and tolerability (How was this assessed?)                                       | Line 88-100                                                         |
|                                         | 10d  | Adverse and unanticipated events                                                                       | Not have.                                                           |
|                                         | 11a  | A scientific discussion of the strengths AND limitations associated with this case report              | Line 102-171                                                        |
| Discussion                              | 11b  | Discussion of the relevant medical literature <b>with references</b> .                                 | Line 205-273                                                        |
|                                         | 11c  | The scientific rationale for any conclusions (including assessment of possible causes)                 | Line 102-171                                                        |
|                                         | 11d  | The primary “take-away” lessons of this case report (without references) in a one paragraph conclusion | Line 173-180                                                        |
|                                         | 12   | The patient should share their perspective in one to two paragraphs on the treatment(s) they received  | Line 85-100                                                         |
| Patient Perspective<br>Informed Consent | 13   | Did the patient give informed consent? Please provide if requested                                     | Yes <input checked="" type="checkbox"/> No <input type="checkbox"/> |
